# Supplementary material
Source: PubMed Central journal article supplement (PMC5873227)

## Supplement Materials and Methods

### *DMS evaluation*

Day 12 megakaryocytes were stained for CD42b and washed with PBS. They were then resuspended in 200  $\mu$ l PBS and stained for 60 minutes with di-8-ANEPPS (Life Technologies) at a final concentration of 10  $\mu$ M. Mean fluorescence of PE in the anti-CD42b population was used to quantify the DMS<sup>1</sup>.

### *FV uptake into Megs*

Day 12 megakaryocytes were pulse-labeled with FV by incubating with 200 nM of the previously described FV variant<sup>35</sup> tagged with Alexa-647 for 1 hour at 37°C as described previously<sup>2</sup>. Excess FV was removed by washing with PBS. Megakaryocytes were analyzed for FV content by flow cytometry.

### *In vitro proplatelets release potential*

Proplatelet extensions were determined using Day 12 megakaryocytes plated on fibronectin-coated dishes (50  $\mu$ g/ml, Millipore) and incubated overnight in regular culture medium to allow cells to adhere. The next day, consecutively observed attached proplatelet-bearing megakaryocytes were analyzed using phase contrast microscopy. Shafts extending from the main cell body were defined as proplatelet protrusions (PPP), and their number counted per megakaryocyte. Additionally, if the shafts were further branched the branches were defined as proplatelet extensions (PPE) and their number counted per megakaryocyte as well<sup>3,4</sup>.

Regular suspension growth conditions were used to isolate EV-PLPs<sup>5</sup>. Day 8 growing megakaryocytes were plated in fresh differentiation medium supplemented with DMSO as vehicle control, or SU6656 or Y27632 or AZD1152, and incubated for 4 days (Figure 1). After that EV-PLP supernatant was obtained by centrifugation at 1000 rpm for 10 minutes. The EV-PLPs were pelleted at 2500 rpm for 10 minutes with 1  $\mu$ M/ml of prostaglandin E1 (Sigma-Aldrich), and then resuspended in 100  $\mu$ l of Annexin-V buffer containing anti CD41, CD42a, CD42b and Annexin-V for phenotypic and apoptosis analyses.

### *Hematocytometer manual megakaryocyte cell counts*

At day 8 and 12, the cells were counted using an Improved Neubauer hemacytometer (Fisher Scientific). Nonviable cells were excluded using trypan blue (TB) stain (Sigma-Aldrich, Seelze, Germany). Cells were mixed with TB solution (4:1), and immediately, the number of live (unstained) cells was determined using a light Leica microscope (Leica Microsystems CMS GmbH).

## Supplement References

1. Avanzi MP, Goldberg F, Davila J, et al. Rho kinase inhibition drives megakaryocyte polyploidization and proplatelet formation through MYC and NFE2 downregulation. *Br. J. Haematol.* 2014;164(6):867–876.
2. Sim X, Jarocha D, Hayes V, et al. Identifying and enriching the platelet-producing human stem cell-derived megakaryocytes using factor V uptake. *Blood.* 2017;
3. Kawaguchi T, Hatano R, Yamaguchi K, et al. Fibronectin promotes proplatelet formation in the human megakaryocytic cell line UT-7 / TPO. *Cell Biol. Int.* 2012;36:39–45.
4. Foudi A, Kramer DJ, Qin J, et al. Distinct , strict requirements for Gfi-1b in adult bone marrow red cell and platelet generation. *J. EXP. Med.* 2014;211(5):909–927.
5. Takayama N, Nishikii H, Usui J, et al. Generation of functional platelets from human embryonic stem cells in vitro via ES-sacs, VEGF-promoted structures that concentrate hematopoietic progenitors. *Blood.* 2008;111(11):5298–5306.

## Supplement Table and Figures legend

### Supplement Table 1. List of antibodies used in this paper.

List of antibodies and their uses in this study.

### Supplement Figure 1. Maturation of the in vitro-grown megakaryocytes in the presence of inhibitors as measured by DMS and FV uptake.

(A) through (C) represent effects of drugs on the development of the DMS in in vitro-grown megakaryocytes as measured by MFI and expressed as % of control. (A) demonstrates MFI of DMS in all CD42b<sup>+</sup> megakaryocytes, (B) and (C) demonstrate the same evaluation per CD42b<sup>+</sup> megakaryocyte size (FSC) or granularity (SSC), respectively. All results are expressed as % of the control (100%). Mean  $\pm$  1 SEM are shown with N = 7 independent studies per arm. \* =  $p \leq 0.05$  compared to control, by one-way ANOVA analysis. (D) through (F) represent effects of drugs on uptake of FV into in vitro-grown megakaryocytes as measured by MFI and expressed as % of control. (D) demonstrates MFI of FV uptake in all CD42b<sup>+</sup> megakaryocytes, (E) and (F) demonstrate the same evaluation per CD42b<sup>+</sup> megakaryocyte size (FSC) or granularity (SSC), respectively. All results are expressed as % of the control (100%). Mean  $\pm$  1 SEM are shown with N = 5 independent studies per arm. \* =  $p \leq 0.05$  compared to control, by one-way ANOVA analysis.

### Supplement Figure 2. Influence of inhibitors on the quality of in vivo-released platelets from megakaryocytes infused into NSG mice.

(A) Percent of TO<sup>+</sup> circulating platelets representing the released platelets from infused either control (open circles) or drug-treated (colored squares) megakaryocytes. (B) Percent of Annexin-V<sup>+</sup> circulating platelets representing the released platelets from infused either control or drug-treated megakaryocytes. In (A) and (B), mean  $\pm$  1 SEM are shown with N  $\geq$  6 independent studies per arm. \* =  $p \leq 0.05$  compared to control, by one-way ANOVA analysis.

### Supplement Figure 3. Dose-dependent response of in vivo-released platelets from infused megakaryocytes after thrombin stimulation.

Whole murine blood isolated four hours after hdPIts or human megakaryocytes were infused into NSG mice. (A) and (B) are mean  $\pm$  1 SEM of (A) PAC-1 binding MFI and (B) CD62P surface expression MFI pre- and post a range of low to high dose thrombin on the human platelets in whole murine blood 4 hours after the initial infusion. Gray circles = infused hdPIts. Open circles = infused control megakaryocytes. Colored squares = infused drug-treated megakaryocytes. N = 3 independent studies for thrombin range

dose for each arm. \* =  $p < 0.05$  compared to hdPIIs.

| Target           | Source               | Reactivity    | Label        | Company        | Catalog number | Usage              |
|------------------|----------------------|---------------|--------------|----------------|----------------|--------------------|
|                  | Monoclonal mouse     | Human         | APC          | BD Biosciences | 559777         | Flow cytometry     |
| CD42a            | Monoclonal mouse     | Human         | BV421        | BD Biosciences | 565444         | Flow cytometry     |
| CD42b            | Monoclonal mouse     | Human         | PE           | BD Biosciences | 555473         | Flow cytometry     |
| Annexin V        | Bacteria             | Human         | FITC         | BD Biosciences | 556420         | Flow cytometry     |
| Annexin V        | Bacteria             | Human         | V450         | BD Biosciences | 560506         | Flow cytometry     |
| PAC-1            | Monoclonal mouse     | Human         | FITC         | BD Biosciences | 340507         | Flow cytometry     |
| CD62P            | Monoclonal mouse     | Human         | BV421        | BD Biosciences | 564038         | Flow cytometry     |
| CD41<br>MWRReg30 | Rat Fab2             | Mouse         | AF 647       | BD Biosciences | 553847         | Intra-vital injury |
| DNA              | DNA dye              | Nucleic acids | Violet stain | Invitrogen     | V35003         | Flow cytometry     |
| DNA, RNA         | (Tiazole Orange) dye | Nucleic acids | green        | BD Biosciences | 349204         | Flow cytometry     |

AF Alexa Fluor  
PE R-phycoerythrin  
APC Allophycocyanin  
FITC fluorescein isothiocyanate

# Suppl Fig 1

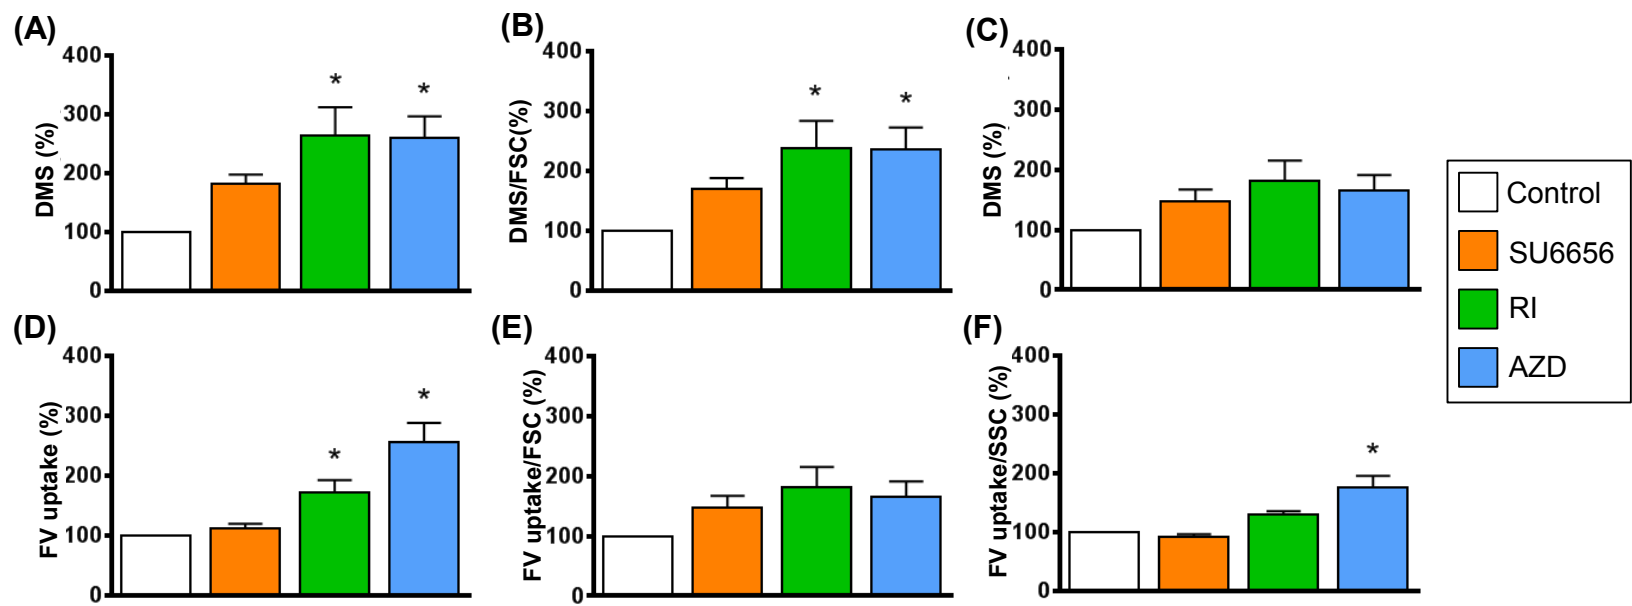

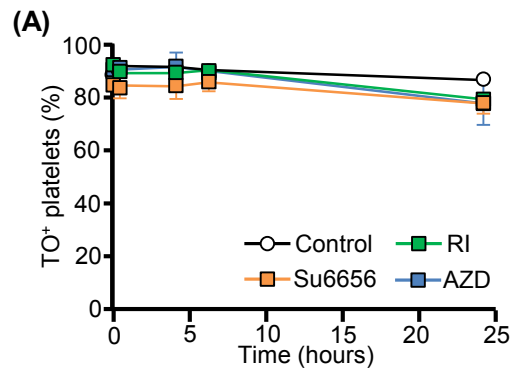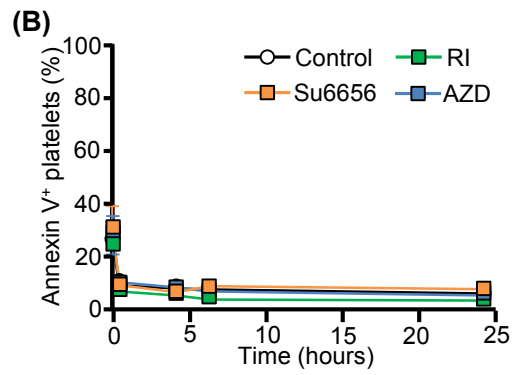

# Suppl Fig 3

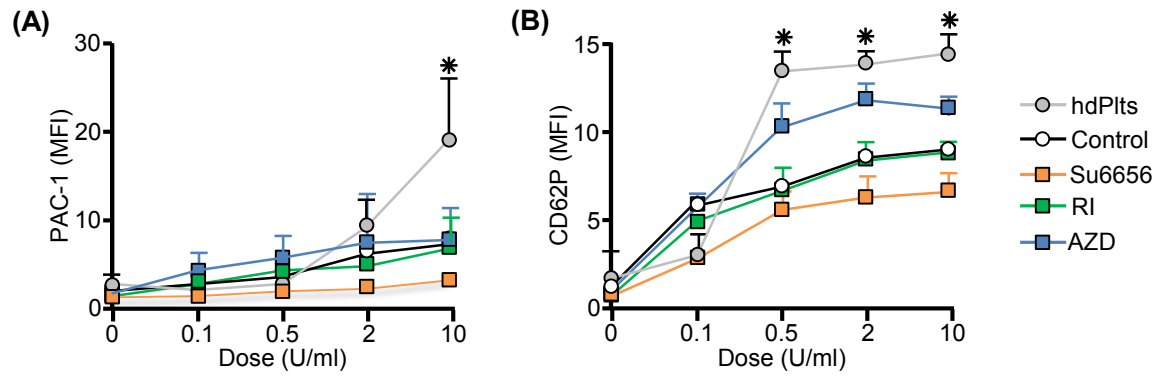

Supplement: ba010975-suppl1.pdf [file ba010975-suppl1.pdf]
